# Supplementary material for: HIF1α-dependent mitophagy facilitates cardiomyoblast differentiation
Source: Cell Stress. 2020 Mar 4;4(5):99–113. doi: 10.15698/cst2020.05.220 (PMC7212530; doi:10.15698/cst2020.05.220)
Supplement: Supplementary file 1 [file ces-04-099-s01.pdf]

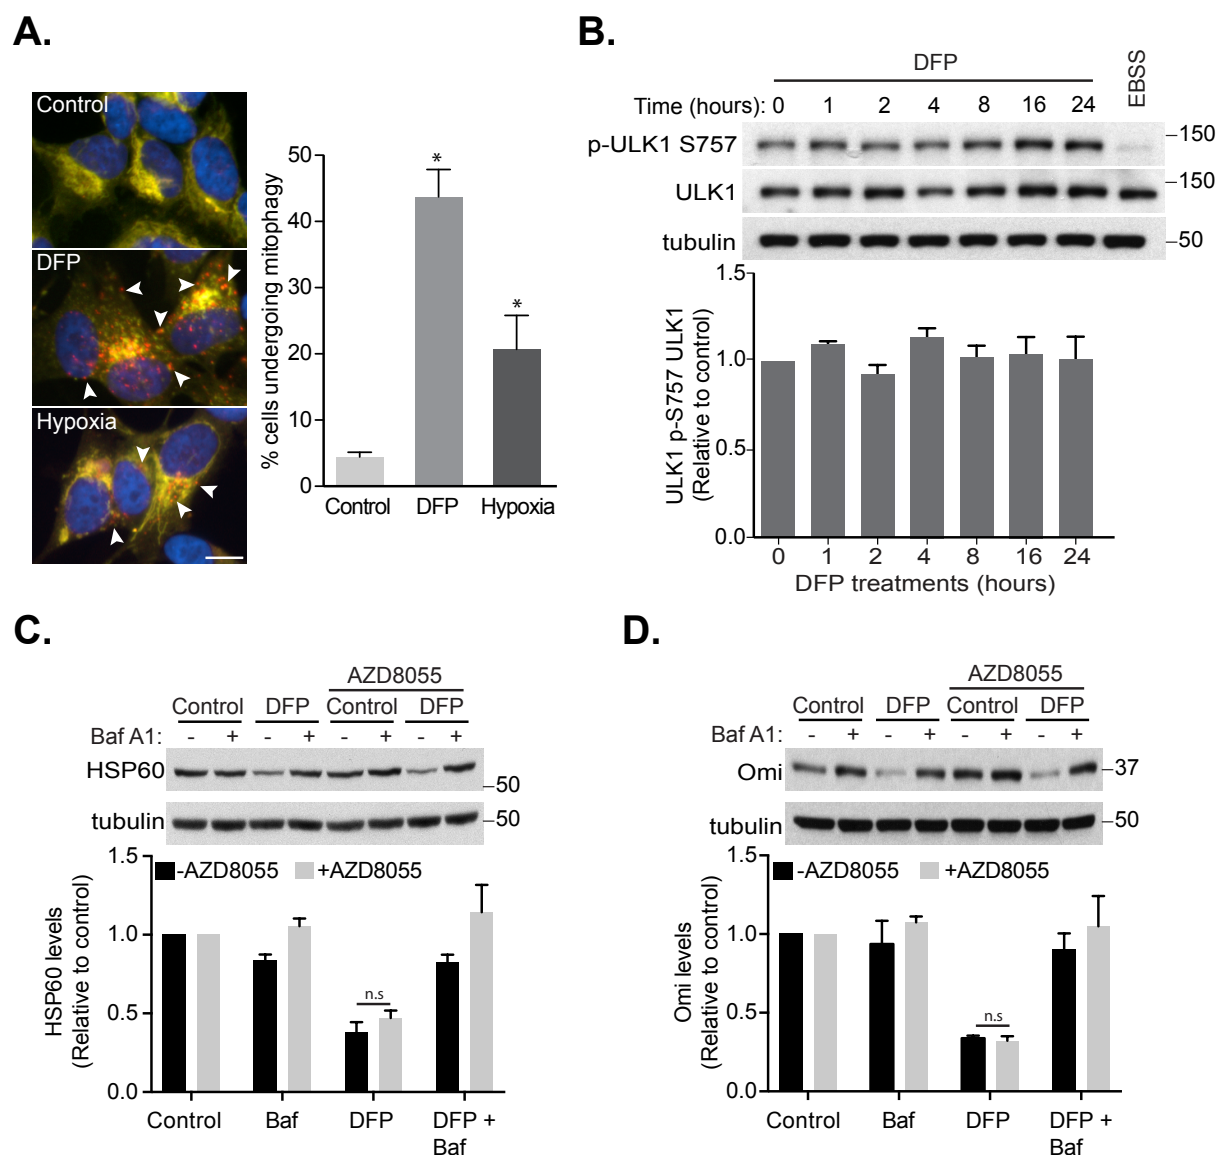

**Figure S1. mTOR is not a key regulator of DFP-induced mitophagy.**

(A) *mito-QC* SH-SY5Y cells were treated with 1 mM DFP or placed under hypoxic conditions (0.5% O<sub>2</sub>) for 24 hours prior to fixation. (B) SH-SY5Y cells were treated with 1mM DFP for the indicated time or incubated with EBSS medium for 2 h. ULK1 S757 phosphorylation and ULK1 expression were examined. SH-SY5Y cells were treated with or without 1mM DFP and 1  $\mu$ M AZD8055 for 24 h and 50 nM Baf A1 was added into medium for the last 16 h prior to lysis. HSP60 (C) and Omi (D) protein levels were examined.  $\alpha$ -tubulin was used as a loading control. All quantitative data are mean  $\pm$  SEM from 3 independent experiments. Scale bar, 10  $\mu$ m.

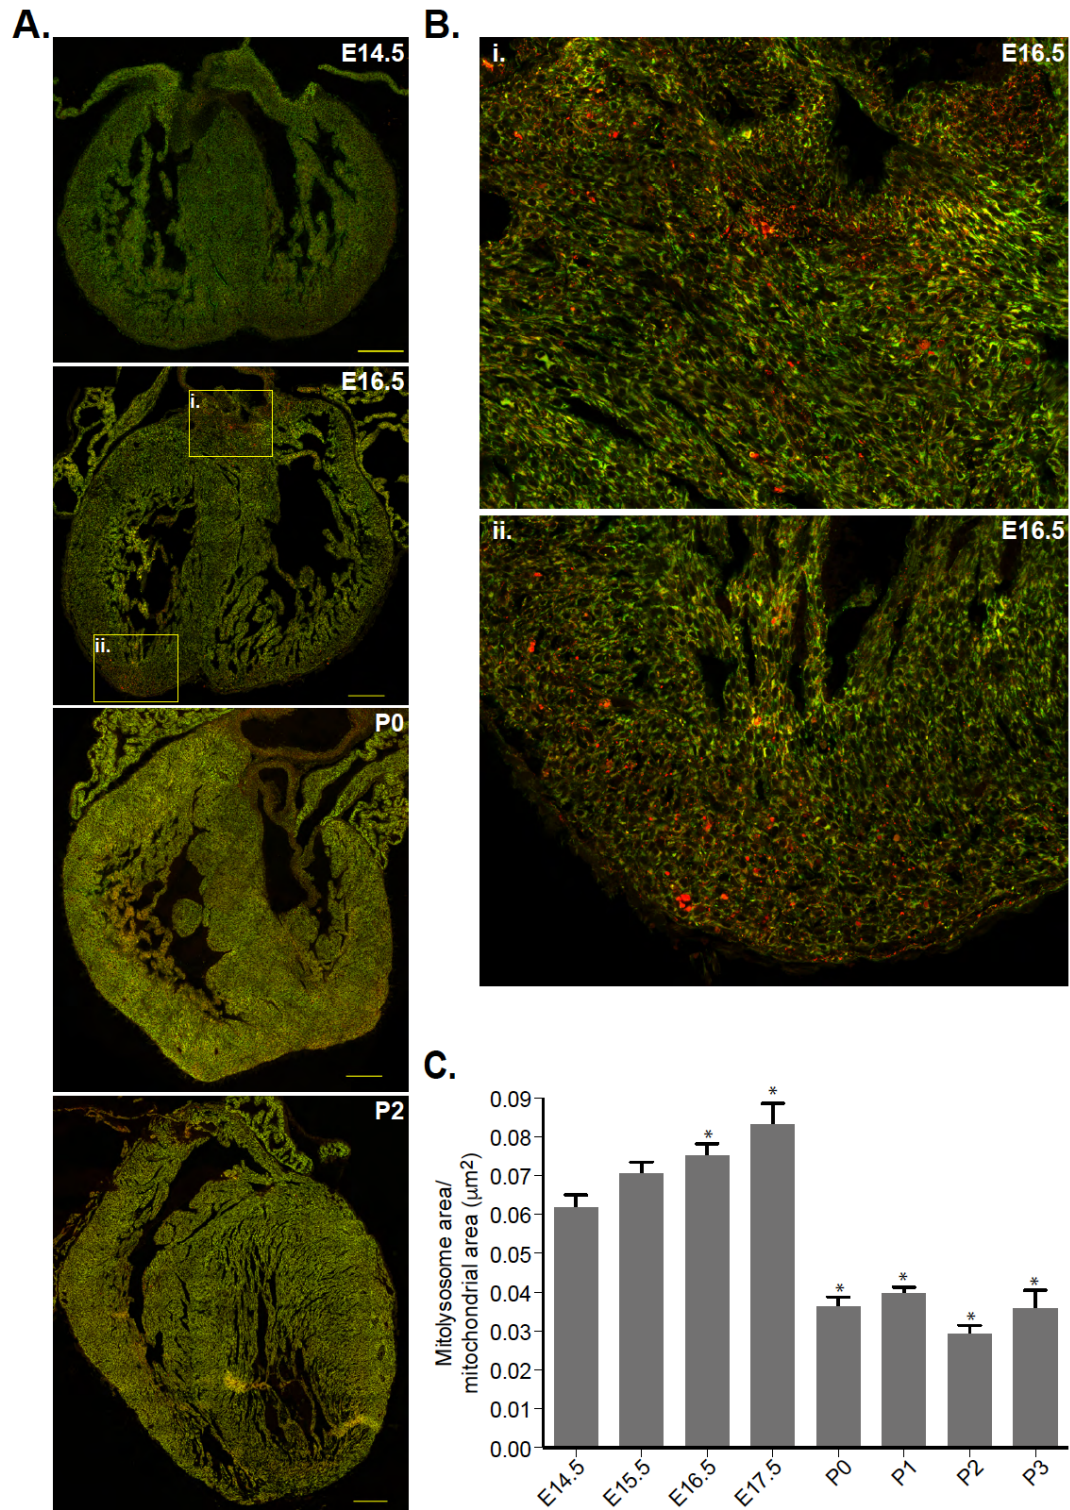

**Figure S2. Mitophagy levels increase during foetal heart development.** (A) Representative images of embryonic hearts from embryo 14.5 (E14.5), E16.5 and neonatal P0 and P2 of *mito-QC* reporter mice. (B) Magnified view of E16.5 heart from (A). (C) Quantitation of mitolysosomes from whole heart sections at different stages of heart development. Scale bar, 200  $\mu\text{m}$ . All quantitative data are mean  $\pm$  SEM from at least 5 animals per group. \*  $P < 0.05$ .

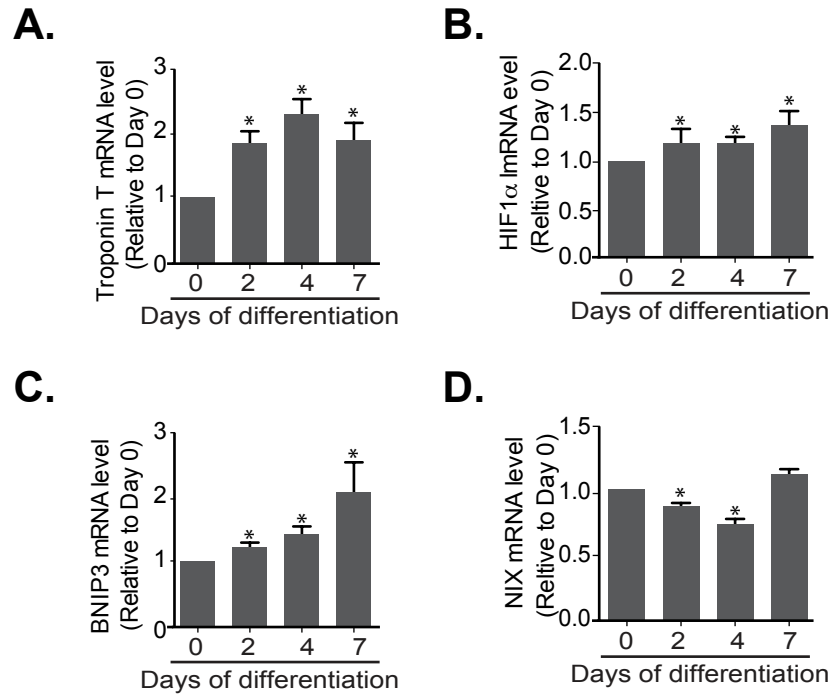

**Figure S3. mRNA levels of HIF1 $\alpha$ -related genes during cardiomyoblast differentiation.** Troponin T (A) HIF1 $\alpha$  (B), BNIP3 (C) and NIX (D) mRNA levels were examined in H9c2 cells during differentiation for 0, 2, 4 and 7 days. GAPDH was used as a loading control. All quantitative data are mean  $\pm$  SEM from 3 independent experiments. \*  $P < 0.05$ .

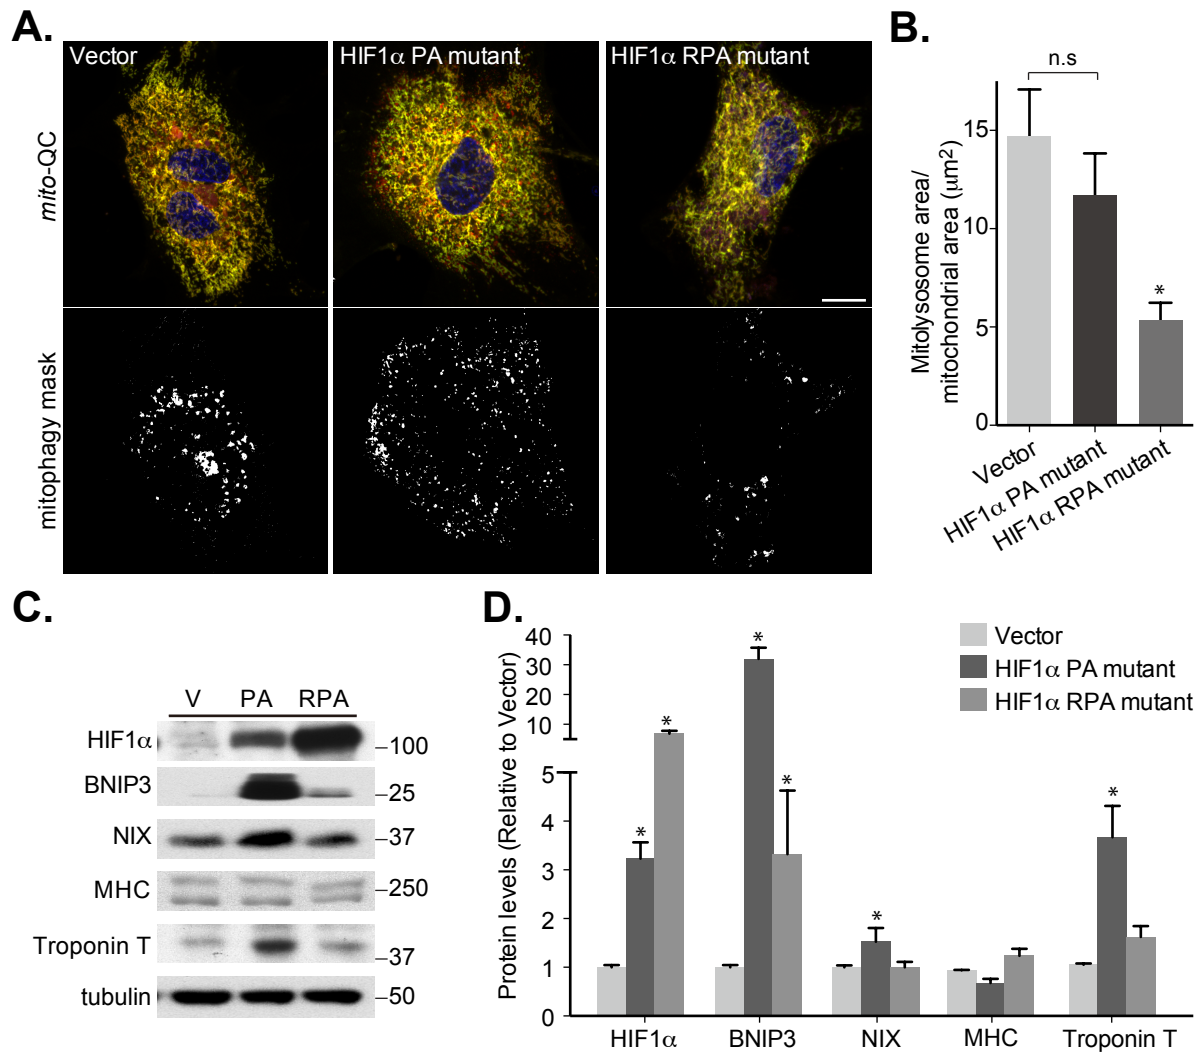

**Figure S4. Increasing HIF1α stability induces cardiomyocyte differentiation.** *mito-QC* H9c2 cells stably expressing either Vector, Flag-HIF1α P402A/P564A (HIF1α-PA) or Flag-HIF1α P402A/P564A/R27G (HIF1α-RPA). (A) Representative images from cells cultured in differentiation medium for 7 days. Mitophagy mask represented as the mCherry/GFP ratio intensity above the mean of mCherry intensity. (B) Quantitation from (A) of total mitolysosome area per mitochondrial content as indicated. (C-D) H9c2 cells stably expressing Vector, Flag-HIF1α-PA or Flag-HIF1α-RPA were cultured in differentiation medium for 7 days. HIF1α, BNIP3, NIX, MHC, cardiac Troponin T protein levels were examined. α-tubulin was used as a loading control. Scale bar, 20 μm. All quantitative data are mean ± SEM from 3 independent experiments. \*  $P < 0.05$ , n.s, not significant.

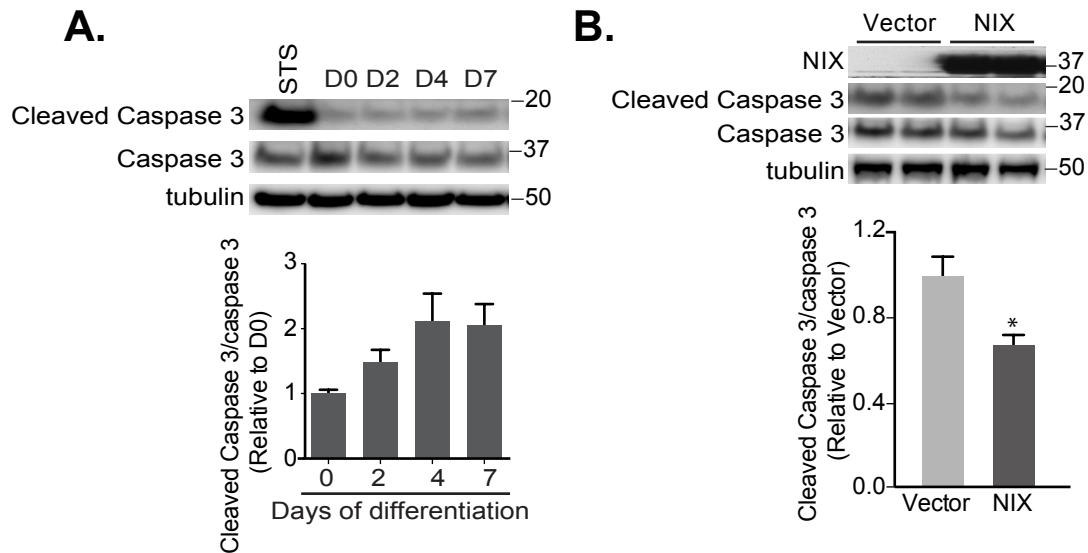

**Figure S5. Overexpression of NIX does not enhance caspase cleavage during differentiation.** (A) Cleaved caspase 3 and caspase 3 protein levels were examined in H9c2 cells during differentiation for 0, 2, 4 and 7 days. 1  $\mu$ M Staurosporine (STS) treatment for 4 h was used as positive control. (B) H9c2 cells stably overexpressing vector or NIX cultured in differentiation medium for 7 days. NIX, cleaved caspase 3 and caspase 3 protein levels were examined.  $\alpha$ -tubulin was used as a loading control. All quantitative data are mean  $\pm$  SEM from 3 independent experiments. \*  $P < 0.05$ .
